# Supplementary material for: Smoking Trends among U.S. Latinos, 1998–2013: The Impact of Immigrant Arrival Cohort
Source: PubMed Central journal article supplement (PMC5369091; doi:10.3390/ijerph14030255), 2017-03-02
Supplement: ijerph-14-00255-s001.pdf [file ijerph-14-00255-s001.pdf]

# Supplementary Materials: Smoking Trends among U.S. Latinos, 1998–2013: The Impact of Immigrant Arrival Cohort

Georgiana Bostean\*, Annie Ro and Nancy L. Fleischer

**Table S1.** Logistic regressions predicting current smoking among Hispanic men (period and duration interaction).

| Survey Year (1998 = Ref)              |                   |
|---------------------------------------|-------------------|
| 2003                                  | 0.84<br>(0.11)    |
| 2008                                  | 1.00<br>(0.16)    |
| 2013                                  | 0.71 *<br>(0.10)  |
| Duration of U.S. stay (US-born = ref) |                   |
| <5 years                              | 0.72<br>(0.23)    |
| 5–9 years                             | 0.72<br>(0.16)    |
| 10–14 years                           | 0.61 *<br>(0.14)  |
| Period * duration interaction         |                   |
| 2003 * US-born (reference)            | 1.00<br>(0.00)    |
| 2003 * < 5 years                      | 0.87<br>(0.32)    |
| 2003 * 5–9 years                      | 0.85<br>(0.27)    |
| 2003 * 10–14 years                    | 0.86<br>(0.26)    |
| 2008 * US-born (reference)            | 1.00<br>(0.00)    |
| 2008 * < 5 years                      | 0.79<br>(0.33)    |
| 2008 * 5–9 years                      | 0.95<br>(0.34)    |
| 2008 * 10–14 years                    | 0.33 **<br>(0.13) |
| 2013 * US-born (reference)            | 1.00<br>(0.00)    |
| 2013 * < 5 years                      | 2.04<br>(1.03)    |
| 2013 * 5–9 years                      | 0.81<br>(0.28)    |
| 2013 * 10–14 years                    | 1.01<br>(0.31)    |
| n                                     | 5313              |

Notes: Model controls for age, age-squared, education, and language of interview; standard errors in parentheses;

\*\*\*  $p < 0.001$ , \*\*  $p < 0.01$ , \*  $p < 0.05$ , +  $p < 0.10$ .

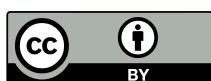

© 2017 by the authors. Submitted for possible open access publication under the terms and conditions of the Creative Commons Attribution (CC-BY) license (<http://creativecommons.org/licenses/by/4.0/>).
